# Supplementary material
Source: PubMed Central journal article supplement (PMC7575002)
Supplement: NIHMS1542947-supplement-1.pdf [file NIHMS1542947-supplement-1.pdf]

## **Movie legend**

**Movie S1.** Comparison of the 3 tail structures. Successive frames switch between the cross-sections of the free, virion and ejected tail tubes

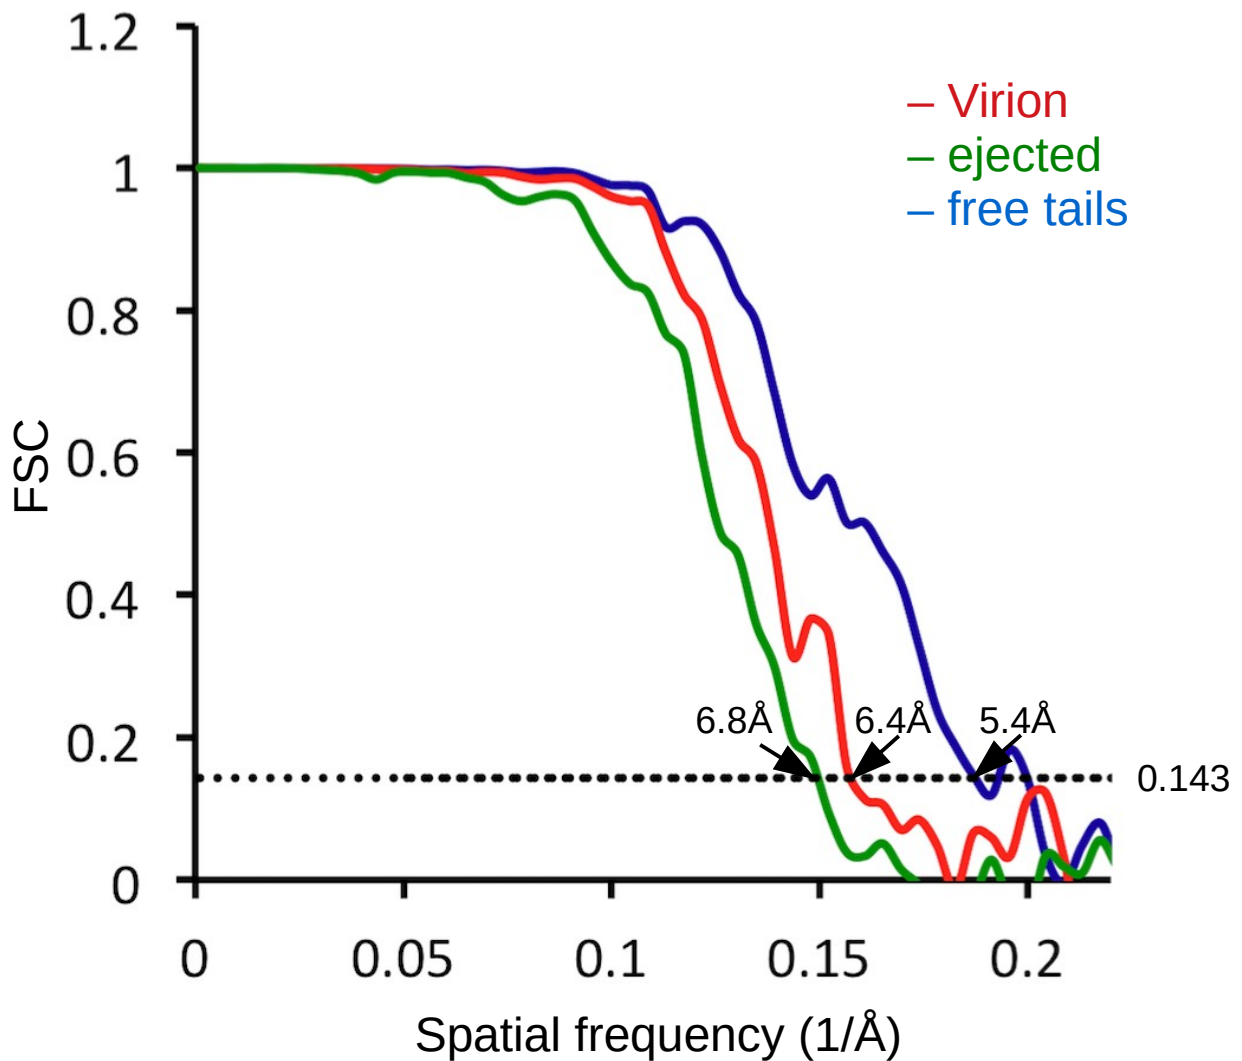

**Figure S1.** “Gold standard” Fourier shell correlation (FSC) curves of the virion, ejected, and free tail tube reconstructions. The dashed line indicates the 0.143 threshold at which resolution is estimated.

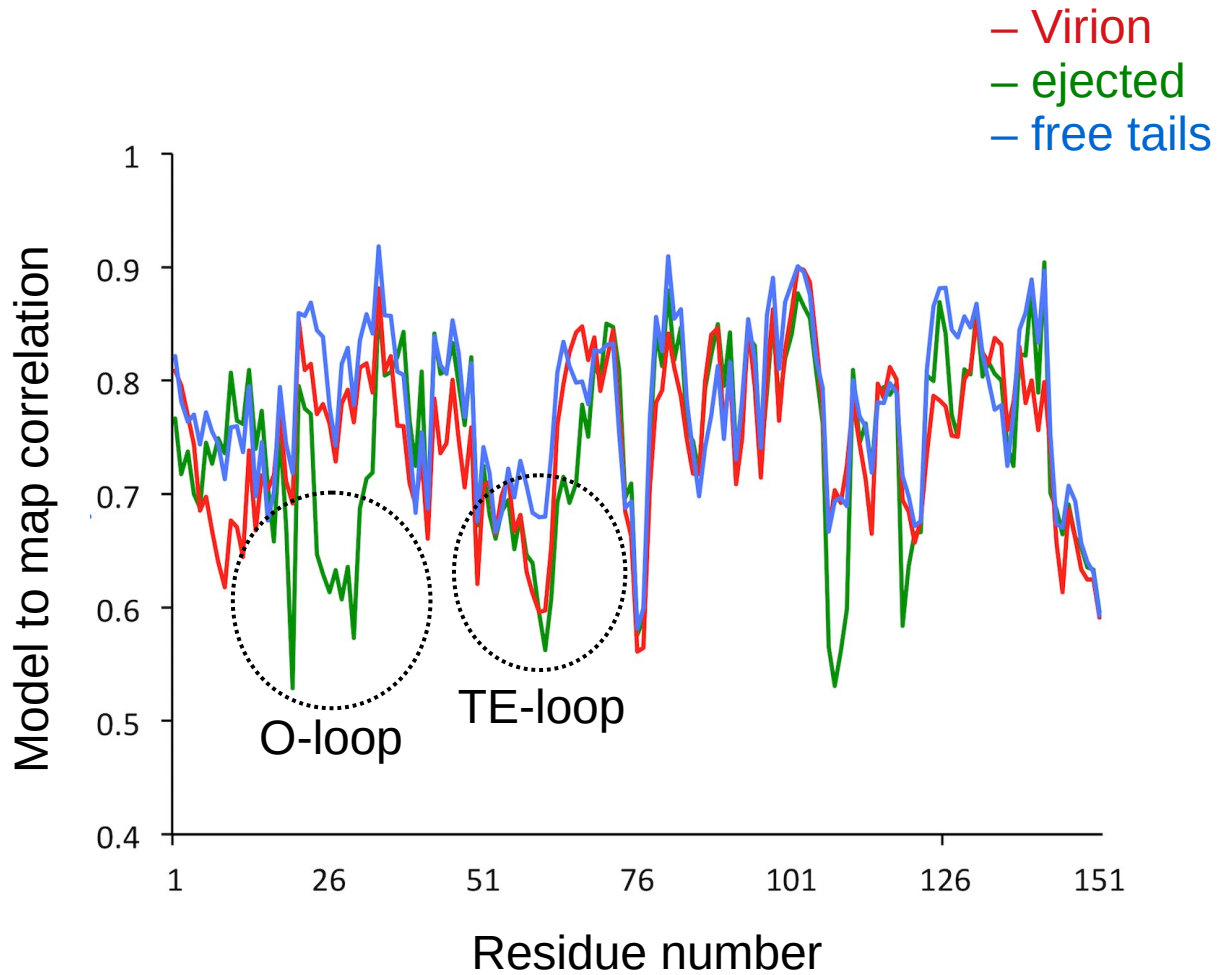

**Figure S2.** “per residue” correlation between the gpV<sub>N</sub> model and the 3 maps. Dashed circles emphasize 2 structural domains with slight differences between the maps.

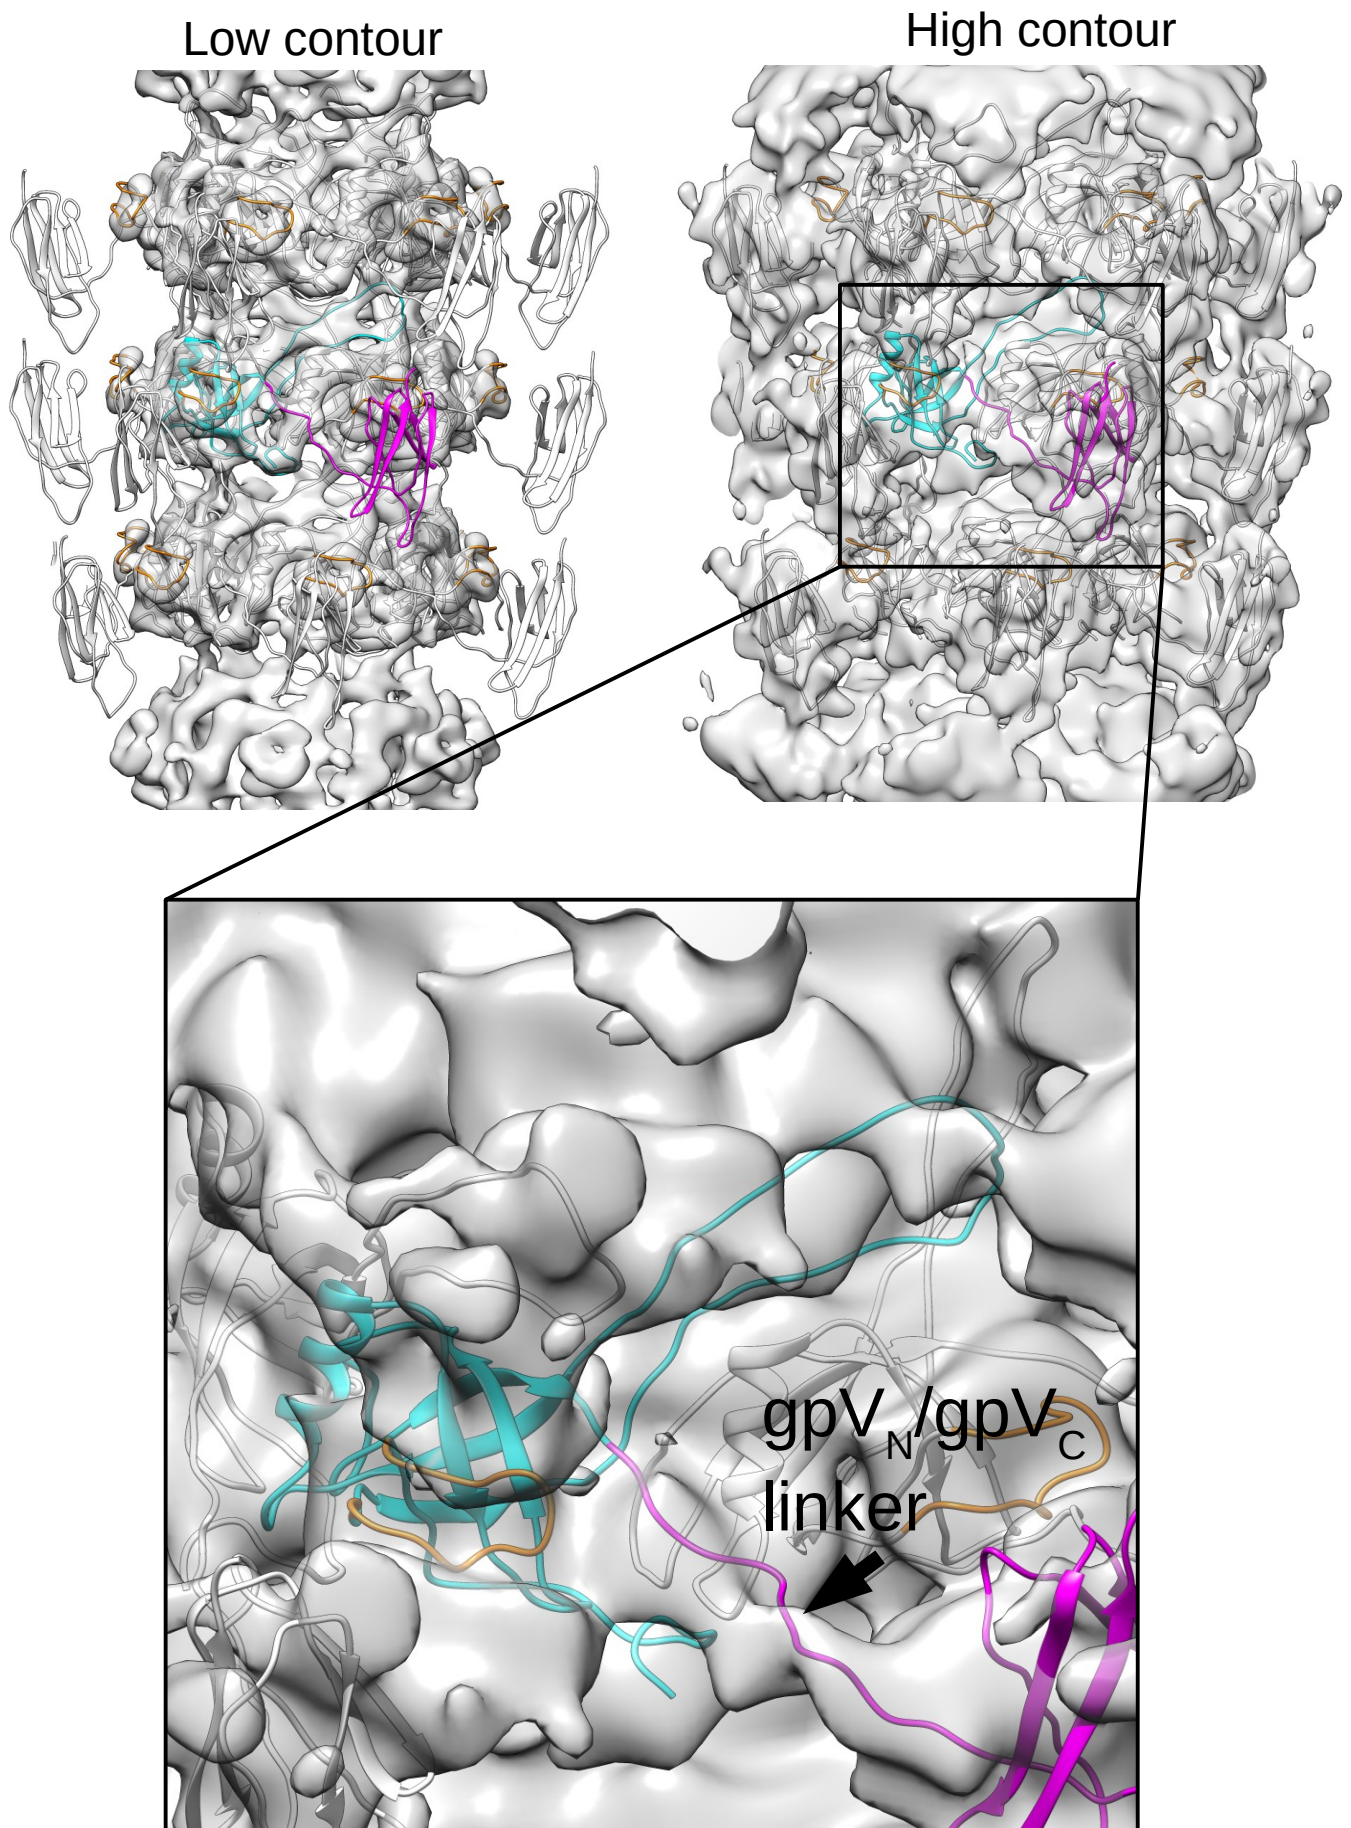

**Figure S3.** Free lambda tail map shows at (top left) low contour level – showing mostly the density due to gpV<sub>N</sub> – and at (top right) high contour level – showing the more flexible Ig-like domain. The high contour map shows the linker density between the two gpV domains (bottom).

| <b>model</b>                   |                            |
|--------------------------------|----------------------------|
| molprobity score               | 2.29                       |
| clash score                    | 0.45                       |
| <b>Ramachandran</b>            |                            |
| outliers                       | 1.95%                      |
| allowed                        | 15.58%                     |
| favored                        | 82.47%                     |
| <b>Model to map comparison</b> |                            |
| virion                         |                            |
| CC 0.84                        | FSC/model<br>(0.143): 5.9Å |
| ejected                        |                            |
| CC 0.83                        | FSC/model<br>(0.143): 6.0Å |
| free tail                      |                            |
| CC 0.81                        | FSC/model<br>(0.143): 5.9Å |

**Figure S4.** Model and map statistics. CC stand for the cross-correlation calculated by phenix between the gpV<sub>N</sub> model and the indicated map
